# Supplementary material for: Optimal Swimming Speed in Head Currents and Effects on Distance Movement of Winter-Migrating Fish
Source: PLoS One. 2008 May 14;3(5):e2156. doi: 10.1371/journal.pone.0002156 (PMC2359855; doi:10.1371/journal.pone.0002156)
Supplement: Appendix S1 — Mathematical calculations and considerations on optimal swimming speed in head currents under the assumption that energy use is a power function of swimming speed (0.17 MB DOC) [file pone.0002156.s001.doc]

**Appendix 1**

**The mathematical problem**

Consider a fish swimming upriver against the current. Insert a coordinate axis along the river with positive direction against the current. Assume that the water in the river flows with a constant velocity *vc* > 0. Consider a water particle which at time *t* = 0 is at the origin of the coordinate axis. The position[[1]](#footnote-2) of the particle as a function of time is then given by *sc*(*t*) = -*tvc*. Let *sg* be the positionError: Reference source not found of the fish, and let *s* = *sg* – *sc* be the distance of the fish to the water particle. Assume that the fish is swimming upriver at all times, i.e

Here *vg* and *v* are functions of *t*. Thus, we assume that for all t.

We assume that the amount of energy that the fish is using per time unit is described by a power function given by

where, , and are constants which satisfy the inequalities and , and where is defined by

Our assumptions on and *x* implies that

so that the fish always provides a positive effect, which is increasing with the speed of the fish.

The amount of energy used per unit of distance travelled upriver is given by

We seek to determine a constant value *v* > *vc* of the function *v* which minimizes this value. Put . Our task is then to minimize

for

**Existence and uniqueness of a solution**

**Case** . In this case, is a positive constant, and *h* is minimized by choosing *u* as large as possible.

**Case** . Since in this case, we find that

where is defined by

We see that *F*(0) < 0, and that , and thereby

Since

and both and have the same sign as *x* (except for *u* = 0, where ), we find that

(1)

We now subdivide the case under consideration in two.

**Case** . Since *F*(0) < 0 and (according to (1)), *F* is negative. *h* is thereby strictly decreasing. Therefore, *h* is minimized by choosing *u* as large as possible.

**Case** , *x* > 1. We have *F*(0) < 0 and (according to (1)). Since for , for . Thus, *F* is strictly increasing, and there exist a unique that minimizes h.

**Properties of the solution**

In the remaining part of the text we consider the case , *x* > 1, in other words the case where , and *x* > 1. In this case we have found that there exists a unique *u* minimizing . This *u* is characterized by the following equivalent conditions:

where is defined by

The last condition shows that the minimizing *u* depends only on and *x*, and not on . The minimizing *u* can thus be regarded as a function of and *x*. This function, , is implicitly defined by

(2) for all , *x* > 1.

We find that

Since , the Implicit Function Theorem shows that is differentiable of class . Thus, the optimal speed of the fish is a ‘nice’ function of the parameters and *x*, even though we are not able to express this function explicitly using the elementary functions.

For certain values of and *x* it is however possible to give explicit formulae for . The theorem below gives three such formulae

THEOREM

*when* .

PROOF. The first equation follows easily from (2). The other two are based on the observation that *g*(*u*,*x*) is a second or third degree polynomial in (1 + *u*) when *x* equals 2 or 3 respectively. Hence can be solved explicitly for *u* in these cases. In the case *x* = 3 use Cardano’s formula.

Differentiation of equation (2) with respect to gives that

and thereby

Thus *u* is strictly increasing with (the higher the , the faster the fish should swim).

Differentiation of equation (2) with respect to *x* gives that

and thereby

To investigate the sign of this, we notice that

The formula for now shows that

when (and *x* > 1).

Thus, when , *u* is strictly decreasing with *x* (the larger the *x*, the slower the fish should swim).

1. the signed distance to the origin of the coordinate axis. [↑](#footnote-ref-2)
